# Supplementary material for: Characterization of pertussis-like toxin from Salmonella spp. that catalyzes ADP-ribosylation of G proteins
Source: PubMed Central journal article supplement (PMC5454059; doi:10.1038/s41598-017-02517-2), 2017-06-01
Supplement: 41598_2017_2517_MOESM2_ESM.pdf [file 41598_2017_2517_MOESM2_ESM.pdf]

1           **Characterization of pertussis-like toxin from *Salmonella* spp. that catalyzes ADP-**  
2                                                           **ribosylation of G proteins**

3  
4   **Running title:** ADP-ribosyltransferase toxin of *Salmonella*

5  
6   Yukino Tamamura<sup>1</sup>, Kiyoshi Tanaka<sup>2</sup>, and Ikuo Uchida<sup>3\*</sup>

7  
8  
9   <sup>1</sup>Bacterial and Parasitic Diseases Research Division, National Institute of Animal Health, Tsukuba,  
10 Ibaraki, 305-0856, Japan

11   <sup>2</sup>Dairy Hygiene Research Division, Hokkaido Research Station, National Institute of Animal  
12 Health, 4 Hitsujigaoka, Toyohira, Sapporo 062-0045, Japan

13   <sup>3</sup>Veterinary Bacteriology, Department of Pathology, School of Veterinary Medicine, Rakuno  
14 Gakuen University, 582 Bunkyoudai-midorimachi, Ebetsu, Hokkaido, 069-8501, Japan

15  
16   \*Corresponding author:

17       Ikuo UCHIDA

18       Veterinary Bacteriology,

19       Department of Pathology, School of Veterinary Medicine,

20       Rakuno Gakuen University,

21       582 Bunkyoudai-midorimachi, Ebetsu, Hokkaido, 069-8501, Japan

22       Telephone: (81)-11-388-4899

23       E-mail: i-uchida@rakuno.ac.jp

# A

|                                |     |                                                                |
|--------------------------------|-----|----------------------------------------------------------------|
| <i>S. bongori</i> ATCC43975    | 1   | VDFVYRVDSRPPDVI FRDGFSSHGNNRNLQQHIRGDSCAAGSRDSNYIATTS DINETYNI |
| <i>S. Typhimurium</i> DT104 U1 | 1   | VDFVYRVDSRPPDVI FRDGFNSHGNNRNLQQHIRGDSCSAGSRDSNYIATTS DINETYNI |
| <i>S. Worthington</i> 182      | 1   | VDFVYRVDSRPPDVI FRDGFSSHGNNRNLQQHIRGDSCSAGSRDSNYIATTS DINETYNI |
| <i>S. Agoueve</i> 213          | 1   | VDFVYRVDSRPPDVI FRDGFSSHGNNRNLQQHIRGDSCSAGSRDSNYIATTS DINETYNI |
|                                |     |                                                                |
| <i>S. bongori</i> ATCC43975    | 61  | ARVYYSRAATFSGRLYRIRADNSFYSLPPSVAYIESRGVQFNHFERVMMRLQSEYVAVN    |
| <i>S. Typhimurium</i> DT104 U1 | 61  | ARVYYSRTTTFSGRLYRIRADNSFYSLPPSVAYIESRGIQF SHFERVMMRLQSEYVAVN   |
| <i>S. Worthington</i> 182      | 61  | ARVYYSRTTTFSGRLYRIRADNSFYSLPPSVAYIESRGIQF SHFERVMMRLQSEYVAVN   |
| <i>S. Agoueve</i> 213          | 61  | ARVYYSRTTTFSGRLYRIRADNSFYSLPPSVAYIESRGIQF SHFERVMMRLQSEYVAVN   |
|                                |     |                                                                |
| <i>S. bongori</i> ATCC43975    | 121 | SIPIENIQEAVELVYDRNTSQVRDGP GTSNSRYLRVSTQSNPGVIPNLPVPQVSTRERIS  |
| <i>S. Typhimurium</i> DT104 U1 | 121 | SIPIENIQEAVELVYDRNTSQVRDGS GTSNSRYLRVSTQSNPGVIPNLPVPQVSTRERIS  |
| <i>S. Worthington</i> 182      | 121 | SIPIENIQEAVELVYDRNTSQVRDGS GTSNSRYLRVSTQSNPGVIPNLPVPQVSTRERIS  |
| <i>S. Agoueve</i> 213          | 121 | SIPIENIQEAVELVYDRNTSQVRDGS GTSNSRYLRVSTQSNPGVIPNLPVPQVSTRERIS  |
|                                |     |                                                                |
| <i>S. bongori</i> ATCC43975    | 181 | AFGTLISACFSMRGVRDDTRINSNYYEMEFYDARGVLTPELLK                    |
| <i>S. Typhimurium</i> DT104 U1 | 181 | AFGTLISACFSMRGVRDDARSNYYEMEFYDARGVLTPELLD                      |
| <i>S. Worthington</i> 182      | 181 | AFGTLISACFSMRGVRDDARSNYYEMEFYDARGVLTPELLN                      |
| <i>S. Agoueve</i> 213          | 181 | AFGTLISACFSMRGVRDDARSNYYEMEFYDARGVLTPELLN                      |

# B

|                                |     |                                                                |
|--------------------------------|-----|----------------------------------------------------------------|
| <i>S. bongori</i> ATCC43975    | 1   | SNVYATVNNWYLKDTTKYENVKITNVFYADYV LHSPRICAYFTASS-GGSNV---TGCAV  |
| <i>S. Typhimurium</i> DT104 U1 | 1   | -----ADYNTYQSNVQINNLSYGVYRSGDKESQFFCVGLKRGSQVFNVHTLCKL         |
| <i>S. Worthington</i> 182      | 1   | -----ADYNTYQSNVQINNLSHGVIKSGGKDSQFFCIGLNNESQIPNANTMCKM         |
| <i>S. Agoueve</i> 213          | 1   | -----ADYNTYQSNVQINNLSHGVIKSGGKDSQFFCIGLNNESQIPNANTMCKM         |
|                                |     |                                                                |
| <i>S. bongori</i> ATCC43975    | 56  | ADNGYYQKNAGOTSPFMEIFD TVKYFYTTGEEKLSVYIRINAFS--HFDSSVSQNEIIVAG |
| <i>S. Typhimurium</i> DT104 U1 | 50  | DV-----FGTHKQGF DNMLATARYYYATGEDVRIYYKENVWTD RNFTAAAFSGNELIAIT |
| <i>S. Worthington</i> 182      | 50  | DV-----FGTHKQGF DNMLATARYYYTTGEEKVRIYYKENVWADRNF TAGFSGNELIAIT |
| <i>S. Agoueve</i> 213          | 50  | DV-----FGTHKQGF DNMLATARYYYTTGEEKVRIYYKENVWADRNF TAGFSGNELIAIT |
|                                |     |                                                                |
| <i>S. bongori</i> ATCC43975    | 114 | TCN--QWCFGEITK-                                                |
| <i>S. Typhimurium</i> DT104 U1 | 104 | TCN <sup>1</sup> SSDYCMGPTLPN                                  |
| <i>S. Worthington</i> 182      | 104 | TCSSIDYCMGPTLPN                                                |
| <i>S. Agoueve</i> 213          | 104 | TCSSIDYCMGPTLPN                                                |

# C

|            |   | Necessary for<br>NAD binding |                       | NAD-binding<br>site |  | Catalytic<br>glutamate |
|------------|---|------------------------------|-----------------------|---------------------|--|------------------------|
| ArtA-DT104 | 2 | DFVYRVDSR ... 45             | SNYIATTS DINE ... 109 | MMRLQSEYVAL         |  |                        |
| ArtA-SW    | 2 | DFVYRVDSR ... 45             | SNYIATTS DINE ... 109 | MMRLQSEYVAL         |  |                        |
| ArtA-Sb    | 2 | DFVYRVDSR ... 45             | SNYIATTS DINE ... 109 | MMRLQSEYVAL         |  |                        |
| PltA       | 1 | DFVYRVDST ... 35             | SRYIATTS SVNQ ... 93  | MMRLQREYVST         |  |                        |
| MPN372     | 6 | RFVYRVDLR ... 44             | RSYFI STSETPT ... 126 | SFAYQREWFTD         |  |                        |
| Ptx        | 5 | PATVRYDSR ... 46             | NSAFV STSSRR ... 122  | LATYQSEYLAH         |  |                        |
| Ltx        | 3 | DRLYRADS R ... 56            | DDGYV STSISLR ... 106 | PHPYEQEV SAL        |  |                        |
| Ctx        | 3 | DKLYRYVYE ... 56             | DDGYV STSISLR ... 106 | PHDPEQEV SAL        |  |                        |

Figure S1. Alignment of the amino acid (a.a.) sequences of ArtA (A) and ArtB (B) from *Salmonella* Typhimurium DT104 U1, *S. Agoueve* 213, *S. Worthington* 182, and *S. bongori* ATCC43975. The alignment was generated with ClustalW (<http://www.ebi.ac.uk/clustalw/>), and sequences were shaded using BoxShade ([http://www.ch.embnet.org/software/BOX\\_form.html](http://www.ch.embnet.org/software/BOX_form.html)). Identical and similar regions are indicated by black and grey boxes, respectively. (C) Alignment of the residues conserved between ArtA and other ADP-ribosyltransferase toxins. PltA, *S. Typhi* pertussis-like toxin A; MPN372, *Mycoplasma pneumonia* toxin; Ptx, pertussis toxin; Ltx, *Escherichia coli* heat-labile enterotoxin; Ctx, cholera toxin. Conserved residues that are critical for Ptx function are shown in bold.

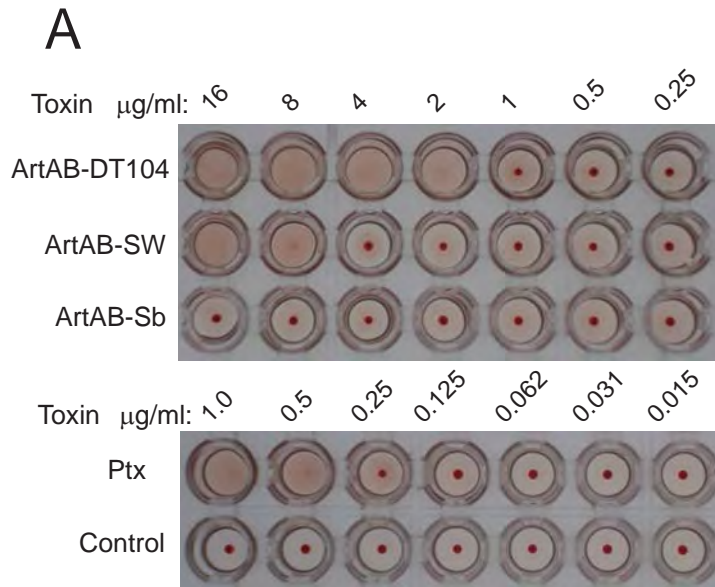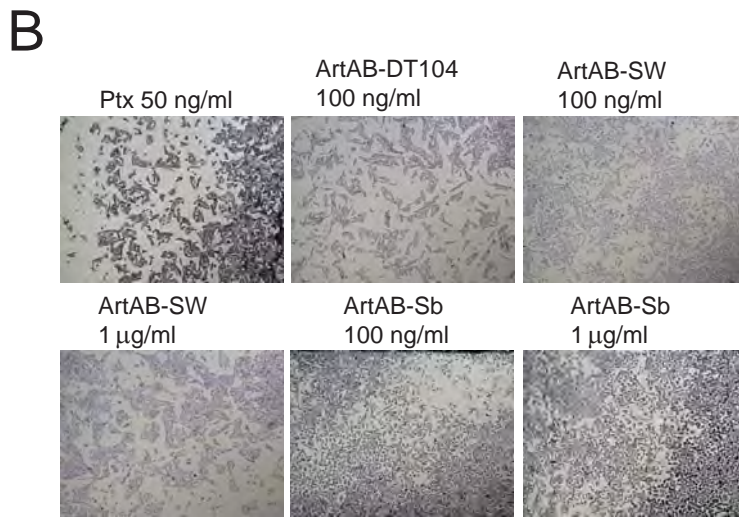

Figure S2. Hemagglutinin (HA) and CHO cell clustering activity of ArtABs and Ptx. (A) HA activity of ArtABs and Ptx. HA activity at different concentrations of sample (serial 2-fold dilutions) using chicken erythrocytes. (B) CHO cell clustering induced by ArtABs. Cells were exposed to Ptx (50 ng/well), ArtAB-DT104 (100 ng/well), ArtAB-SW (1  $\mu\text{g}$  and 100 ng/well), or ArtAB-Sb (1  $\mu\text{g}$  and 100 ng/well).

Toxin preincubated  
with intact cells:

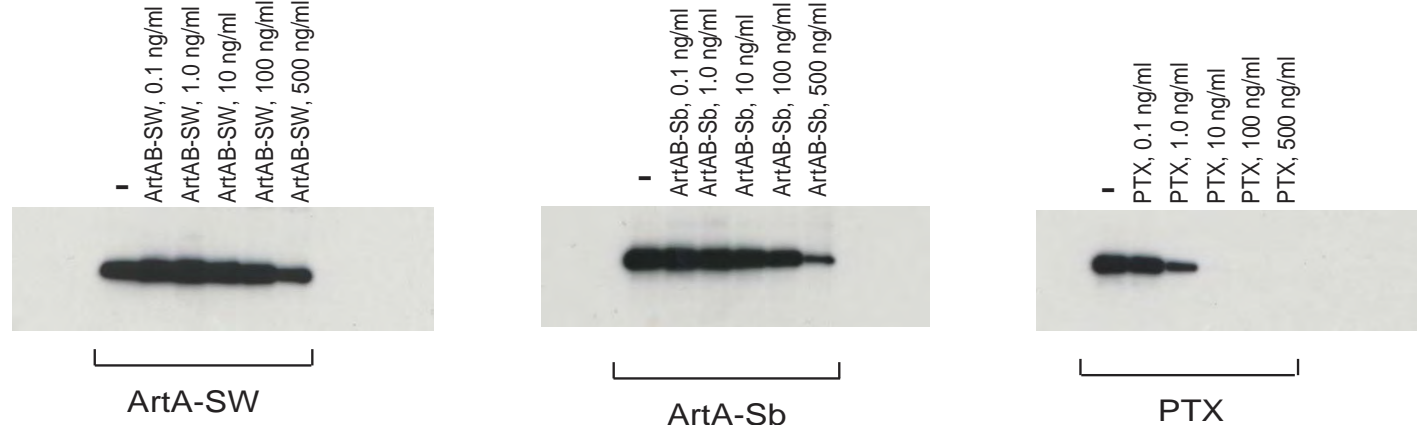

Toxin incubated with  
membrane:

Figure S3. In vitro ADP-ribosylation of cell membrane proteins after pre-treatment of RAW 264.7 cells with ArtAB-SW, ArtAB-Sb, or PTX. RAW 264.7 cells were incubated with various concentrations of ArtAB-SW, ArtAB-Sb, or PTX, indicated in upper row; membranes were subsequently prepared. Membranes prepared from these pretreated cells were incubated with the in vitro expressed toxin indicated in bottom row (“Toxin with membrane”), along with biotinylated NAD, for an in vitro membrane labelling experiment. Samples were resolved by 12.5% SDS-PAGE, and ADP-ribosylated proteins were detected by western blotting using peroxidase-conjugated streptavidin, as described in the Materials and Methods.

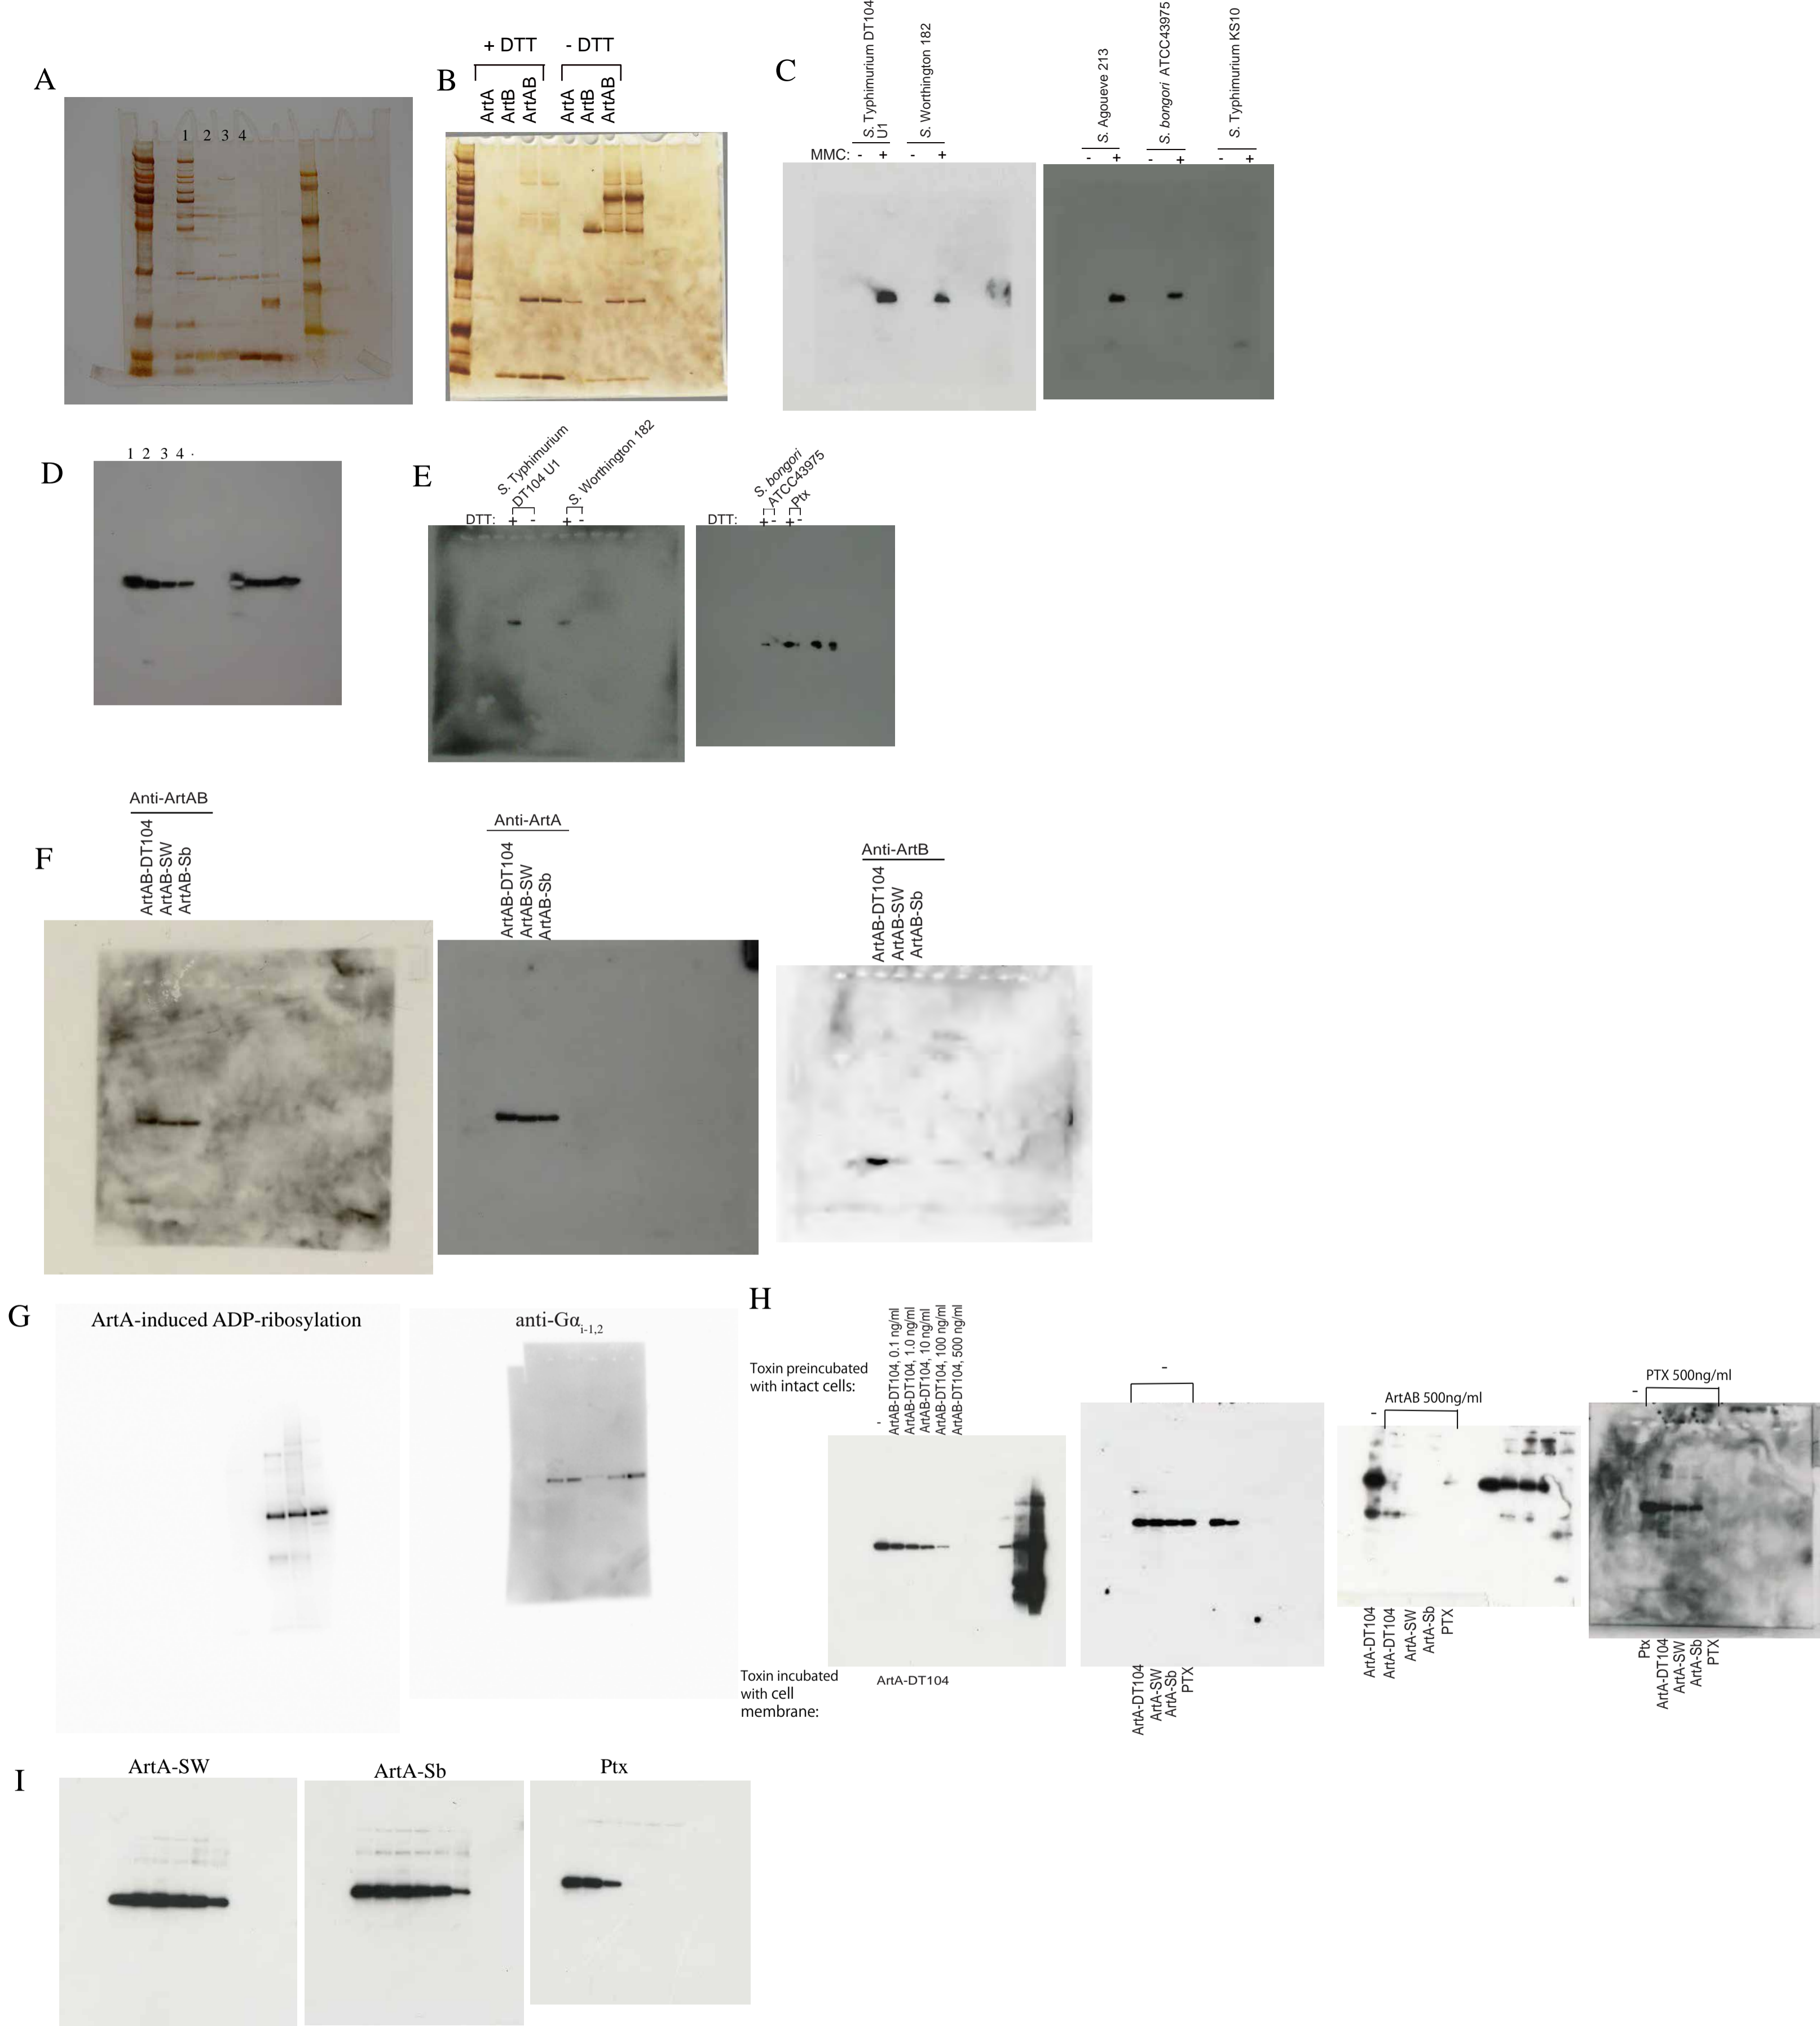

Figure S4. Full length gels and membrane. (A) Full length gel for Figure 1B. 1: Marker 2: *S. Typhimurium* DT104 U1 3: *S. Worthington* 182 4: *S. bongori* ATCC43975 (B) Full length gel for Figure 2B. (C) Full length membrane for Figure 1A. (D) Full length membrane for Figure 1C. 1: PTX 2: *S. Typhimurium* DT104 U1 3: *S. Worthington* 182 4: *S. bongori* ATCC43975 (E) Full length membrane for Figure 1D. (F) Full length membrane for Figure 1E. (G) Full length membrane for Figure 5A. (H) Full length membrane for Figure 5B-E. (I) Full length membrane for Fig.S3.
